# Supplementary material for: Improving quality of withdrawal of life-sustaining measures in organ donation: a framework and implementation toolkit
Source: Springer Nature journal article supplement (doi:10.1007/s12630-020-01774-6), 2020-09-11
Supplement: MOESM1 [file 18370724]

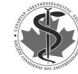

## eAppendix 1. Forum Participants

### Planning Committee

Dr. Andrew Healey (Chair), Chief Medical Officer, Donation, Trillium Gift of Life Network, Hamilton, Ont.; Amber Appleby, Associate Director, Deceased Donation, Canadian Blood Services, Vancouver, BC; Dr. James Downar, Critical Care and Palliative Care, University Health Network and Sinai Health System, Toronto, Ont.; Dr. Michael Hartwick, Regional Medical Lead, Trillium Gift of Life Network, Intensivist and Palliative Care Physician, The Ottawa Hospital, Assistant Professor, Divisions of Critical Care Medicine and Palliative Medicine, University of Ottawa, Ottawa, Ont.; Dr. Sean Keenan, Provincial Medical Director, Donation Services, BC Transplant, Clinical Associate Professor, Critical Care Medicine University of British Columbia, Vancouver, BC; Jehan Lalani, Program Manager, Deceased Donation, Canadian Blood Services, Calgary, Alta; Jim Mohr, Senior Program Advisor, Deceased Donation, Canadian Blood Services, Halifax, NS; Dr. Sam Shemie, Division of Critical Care, Montreal's Children Hospital, Medical Advisor, Deceased Donation, Canadian Blood Services, Professor of Pediatrics, McGill University, Montreal, Que.

### Participants

Dr. Paul Boucher, Critical Care Physician, Foothills Hospital, Calgary, Alta.; Ms. Sarah Crowe, Clinical Nurse Specialist, Critical Care Network Fraser Health and SMH & Jim Pattison Outpatient Care and Surgical Centre, Surrey, BC; Dr. Jesse Delaney, Critical Care / Palliative Care, Scarborough and Rouge Hospital, Scarborough, Ont.; Mr. Nicolas El-Kada, CPE Coordinator, Registered Psychotherapist, CASC Certified Teaching Supervisor, Spiritual Care Services, The Ottawa Hospital-Civic Campus, Ottawa, Ont.; Mr. Edward Ferre, Interim Provincial Operations Director and Director, Program Development and External Relations, BC Transplant, Vancouver, BC; Dr. Alison Fox-Robichaud, Critical Care, Hamilton Health Sciences, President, Canadian Critical Care Society, Hamilton, Ont.; Ms. Torie Gusa, Critical Care Nurse, Canadian Association of Critical Care Nurses (CACCN), Calgary, Alta.; Dr. Laura Hawryluck, Critical Care, University Health Network, Toronto General Hospital, Toronto, Ont.; Ms. Pamela Hughes, Critical Care Nurse, Med, Surg, Neurosurgical Trauma Unit, QEII Health Sciences Centre, Halifax, NS; Dr. Dirk Huyer, Chief Coroner, Ontario, Ministry of Community Safety and Correctional Services, Toronto, Ont.; Dr. George Isac, Anesthesiologist, Intensivist, Vancouver Acute, Vancouver Hospital & Health Sciences Centre, Vancouver, BC; Mr. Michael Kampen, Patient Family Partner, Father of Marshall Kampen, Hamilton, Ont.; Dr. Lisa Kenny, Assistant Professor of Medicine, Critical Care/Neuro-Critical Care, Memorial University, St John's, Nfld.; Ms. Sarah LaRoche, Respiratory Therapist, Nova Scotia Health Authority, Halifax, NS; Florence Lebrun, Social Worker, Royal Columbian Hospital, Vancouver, BC; Francis Moran, Patient Family Partner, Father of Christopher Moran, Ottawa, Ont.; Ms. Alison Morsley, Patient Family Partner, Daughter of Ann Thelma Morsley, Toronto, Ont.; Dr. Laurel Murphy, Emergency Medicine, Critical Care Medicine, Nova Scotia Health Authority, Halifax, NS; Dr. John Muscedere,

Professor of Critical Care Medicine, Queen's University, Intensivist, Kingston General Hospital, Kingston, Ont.; Dr. Bojan N. Paunovic, Medical Director - WRHA Critical Care, Co- Section Head - Critical Care Medicine, Department of Internal Medicine, Assistant Professor - Faculty of Medicine, University of Manitoba, Site Critical Care Lead & MICU Medical Director, Health Sciences Center, Winnipeg, Man.; Dr. Amanda Roze des Ordon, Critical Care Medicine, Palliative Care Clinical Assistant Professor, University of Calgary, Calgary, Alta.; Dr. Aimee Sarti, Intensivist, The Ottawa Hospital, Ottawa, Ont.; Dr. Christy Simpson, Head and Associate Professor, Department of Bioethics, Faculty of Medicine, Dalhousie University, Halifax, NS; Dr. Jenna Spring, Chief Medical Resident, Toronto Western Hospital, Toronto, Ont.; Ms. Amanda Van Beinum, PhD Sociology Student/Health Researcher, Children's Hospital of Eastern Ontario, Ottawa, Ont.; Dr. Brandi Vanderspank, Critical Care Nursing CACCN, Assistant Professor, School of Nursing, Faculty of Health Sciences, University of Ottawa, Ottawa, Ont.; Ms. Tammy Vigliotti, Respiratory Therapist, Providence Health Care, Vancouver, BC; Dr. Matthew Weiss, Pediatric Intensivist, Centre Mère-Enfant Soleil du CHU de Québec, Québec, Que.; Ms. Kimberly Werestiuk, Manager of Patient Care, Transplant Manitoba, Winnipeg, Man.

### **Consultants**

Ms. Manon Abud, Facilitator, Hill + Knowlton Canada, Toronto, Ont.

# eAppendix 2

## Standardized WLSM order set

---

### Preparing for withdrawal of life-sustaining measures (WLSM)

- Notify organ donation organization (ODO) of plan to WLSM
- Arrange private space for patient and family members, if available
- Liberalize visitation
- Consult Spiritual Care/Social Work (if desired by patient or substitute decision maker)
- Discontinue all previous enteral feeds, medications (except vasoactive and those for pain and symptom management), maintenance IV fluids, blood work, dialysis, and radiographs
- Discontinue routine vital sign monitoring
- Discontinue neuromuscular blockade (if neuromuscular blocking agents have been used in the past 4 hours, assess train-of-four. If train-of-four is  $<4/4$ , consider delaying WLSM or use a modified ventilator weaning)
- Confirm do not resuscitate orders are documented

### Pharmaceutical management of distress

#### Pain and dyspnea

- MOR**phine 100 mg in 100 mL 0.9% NaCl infusion at \_\_\_\_\_ mg/h
  - For pain or dyspnea, give additional **MOR**phine IV bolus of \_\_\_\_\_ mg q15 minutes PRN (suggest: 2 mg if opioid-naïve or 2x the hourly infusion rate if already receiving a morphine infusion)
  - If patient receives more than 2 boluses in one hour, THEN start an infusion at 2 mg/h or double the current infusion rate. Adjust the bolus dose to 2x the hourly rate.
  - If the pain or dyspnea persists, notify MD
- fentaNYL** 1,000 mcg in 100 mL 0.9% NaCl infusion at \_\_\_\_\_ mcg/h
  - For pain or dyspnea, give additional **fentaNYL** IV bolus of \_\_\_\_\_ mcg q5 minutes PRN (suggest: 25 mcg if opioid-naïve or 1x the hourly infusion rate if already receiving a fentanyl infusion)
  - If patient receives more than 2 boluses in one hour, THEN start an infusion at 50 mcg/h or double the current infusion rate. Adjust the bolus dose to 1x the hourly rate.
  - If the pain or dyspnea persists, notify MD
- Document on WLSM Documentation Tool (heart rate, respiratory rate and signs and/or symptoms of pain or dyspnea when providing a bolus or adjusting the infusion rate)

## Anxiety and agitation

- Optimize analgesia prior to adjusting sedation
- Midazolam 100 mg in 100 mL 0.9% NaCl infusion at \_\_\_\_\_ mg/h  
(use current dose if patient is already receiving midazolam, but patient may not require sedation)
  - For signs of anxiety or distress, give additional midazolam IV bolus equal to the hourly dose (suggest: 2 mg for patients not receiving an infusion) given q5 minutes PRN
  - If the patient receives more than 2 boluses in one hour, THEN start an infusion at 2 mg/h or double the current infusion rate
  - If the anxiety or agitation persists, notify MD
- Propofol 10 mg/mL premixed vial, infusion at \_\_\_\_\_ mg/kg/h  
(use current dose if patient is already receiving propofol, but patient may not require sedation)
  - For signs of anxiety or distress, give additional propofol IV bolus (suggest: 10-20 mg for patients not receiving an infusion) given q5 minutes PRN
  - If the patient receives more than 2 boluses in one hour, THEN start an infusion at 0.5 mg/kg/h or double the current infusion rate
  - If the anxiety or agitation persists, notify MD
- Document Richmond Agitation-Sedation Scale (RASS) score and assess for signs and/or symptoms of anxiety pre and post each bolus dose or rate adjustment

## Additional medications

- Metoclopramide 10 mg IV q6h PRN for nausea
- Glycopyrrolate 0.4 mg IV q4h PRN for oral secretions

## Withdrawal of physiologic support

### When the family is ready for withdrawal of life support:

- Deactivate defibrillator and discontinue transvenous or transcutaneous cardiac pacing
- Deactivate mechanical hemodynamic support, aortic balloon pump, ventricular assist device, ECMO
- Discontinue all vasoactive medications

**When the patient is unresponsive to verbal stimuli (RASS -4 or -5) and signs of respiratory distress (accessory muscle use, tachypnea, nasal flaring) are managed:**

- Discontinue respiratory support

***For patients mechanically ventilated:***

- RRT to discontinue mechanical ventilation. Choose one of the following options:
- Rapidly wean ventilator to FiO<sub>2</sub> 0.21, PEEP 5cm H<sub>2</sub>O, PS 5cm H<sub>2</sub>O. If patient is comfortable on minimal settings for 5 minutes, extubate to room air.
  - Extubate to room air
  - Other: \_\_\_\_\_

***For patients on non-invasive ventilation or oxygen therapy:***

- RRT to discontinue non-invasive ventilation or oxygen therapy and place on room air

# eAppendix 3

## WLSM checklist

Review checklist with team early, in advance of initiating withdrawal of life-sustaining measures (WLSM).

### Decision making and documentation

| Action                   |                                                                                                                                                                                                                                                             | Notes |
|--------------------------|-------------------------------------------------------------------------------------------------------------------------------------------------------------------------------------------------------------------------------------------------------------|-------|
| <input type="checkbox"/> | The patient's capacity to make decisions and legally correct substitute decision maker has been recorded.                                                                                                                                                   |       |
| <input type="checkbox"/> | A multidisciplinary team meeting has occurred and the outcome has been documented in the medical record. Any consulting services with a pre-existing or close relationship (e.g. surgical services, oncology) were involved in the meeting or the decision. |       |
| <input type="checkbox"/> | The plan of care has been documented in the chart and the patient, where possible, and family is aware of this plan.                                                                                                                                        |       |
| <input type="checkbox"/> | An order to WLSM and an order not to provide cardiopulmonary resuscitation upon death is recorded in the chart.                                                                                                                                             |       |
| <input type="checkbox"/> | A description of WLSM has been provided to the family and translation offered, where required.                                                                                                                                                              |       |

### Preparing for WLSM

| Action                   |                                                                                                                                                                                                                        | Notes                                                                                                                                                                                            |
|--------------------------|------------------------------------------------------------------------------------------------------------------------------------------------------------------------------------------------------------------------|--------------------------------------------------------------------------------------------------------------------------------------------------------------------------------------------------|
| <input type="checkbox"/> | Liberalized family visiting has been offered and, where possible, a space for the family to gather privately has been arranged. The family has been offered an opportunity to participate in patient care during WLSM. |                                                                                                                                                                                                  |
| <input type="checkbox"/> | The organ donation organization (ODO) has been notified of the patient's imminent death.                                                                                                                               | <i>Notification</i> to ODO prior to a planned withdrawal of life support conversation.<br><br><i>Referral</i> to ODO for collaborative planned approach should occur after the decision to WLSM. |
| <input type="checkbox"/> | Ensure patient and/or family have been offered the opportunity to donate organs and tissues according to regional best practice.                                                                                       | The inter-professional team members will jointly develop a plan for approaching and discussing donation options.                                                                                 |

## Consultative supports

| Action                   |                                                                                                                                                                                                       | Notes |
|--------------------------|-------------------------------------------------------------------------------------------------------------------------------------------------------------------------------------------------------|-------|
| <input type="checkbox"/> | Spiritual care, religious and culture supports are offered, including involvement of the patient's own clergy.                                                                                        |       |
| <input type="checkbox"/> | The opportunity for social/religious/cultural observances has been offered, including an attempt to accommodate any last wishes of the patient.                                                       |       |
| <input type="checkbox"/> | A social work consultation has been considered and offered, where appropriate.                                                                                                                        |       |
| <input type="checkbox"/> | Respiratory therapist is aware of WLSM plans.                                                                                                                                                         |       |
| <input type="checkbox"/> | Palliative care consultation is considered and offered, where appropriate.                                                                                                                            |       |
| <input type="checkbox"/> | <b>For DCD cases:</b><br>Where indicated, the Coroner or Medical Examiner service has been contacted, role explained to the family and appropriate authorization for donation obtained prior to WLSM. |       |

## Family and team review

| Action                   |                                                                                                                                                                                                                                                                                                          | Notes |
|--------------------------|----------------------------------------------------------------------------------------------------------------------------------------------------------------------------------------------------------------------------------------------------------------------------------------------------------|-------|
| <input type="checkbox"/> | WLSM order set completed by physician and placed on the chart. An approach for modification of these orders following WLSM is reviewed with the nurse, physician and respiratory therapist to ensure clear approach when the ordered medications fail to obtain goals.                                   |       |
| <input type="checkbox"/> | The specific goals of symptom management are reviewed.                                                                                                                                                                                                                                                   |       |
| <input type="checkbox"/> | Approach to symptom management reviewed with health care team, including: <ul style="list-style-type: none"> <li>possible symptoms which may occur after WLSM</li> <li>medications used to treat possible symptoms</li> <li>medication used to treat any anticipated symptoms not yet present</li> </ul> |       |
| <input type="checkbox"/> | Orders reviewed. ICU nurse, respiratory therapist and other team members who will be present during WLSM are comfortable with treatment plan.                                                                                                                                                            |       |
| <input type="checkbox"/> | Orders written for discontinuation of all non-comfort medications, blood transfusions, dialysis, vasopressors/inotropes, nutrition, antibiotics, intravenous fluids and laboratory work.                                                                                                                 |       |
| <input type="checkbox"/> | Orders written for pace and sequence of WLSM, including mechanical ventilation and artificial airway.                                                                                                                                                                                                    |       |
| <input type="checkbox"/> | The offer is made to have family present for WLSM and end-of-life care.                                                                                                                                                                                                                                  |       |

|                          |                                                                                                                                                                                                   |  |
|--------------------------|---------------------------------------------------------------------------------------------------------------------------------------------------------------------------------------------------|--|
| <input type="checkbox"/> | The room preparation and location of WLSM is reviewed and planned, including removing as much equipment and technology as possible from the room. Ambiance room setup preferences are considered. |  |
| <input type="checkbox"/> | Approach to monitoring has been reviewed with the family and healthcare team. Monitoring flowsheet at bedside.                                                                                    |  |
| <input type="checkbox"/> | Team huddle occurs prior to withdrawal of life support and this includes the family, ensuring everyone understands their roles and actions that will occur prior to and following death.          |  |
| <input type="checkbox"/> | Post an unobtrusive signal to other ICU team members that WLSM is occurring.                                                                                                                      |  |

### During withdrawal of life support

| Action                   |                                                                                                          | Notes |
|--------------------------|----------------------------------------------------------------------------------------------------------|-------|
| <input type="checkbox"/> | Symptom management is provided according to the order set and documented on the WLSM documentation tool. |       |

### Donation after circulatory determination of death ONLY

| Action                   |                                                                                                                                                                                        | Notes                                                                                   |
|--------------------------|----------------------------------------------------------------------------------------------------------------------------------------------------------------------------------------|-----------------------------------------------------------------------------------------|
| <input type="checkbox"/> | The necessity of monitoring for DCD death declaration is reviewed with the family.                                                                                                     |                                                                                         |
| <input type="checkbox"/> | Procedure for death declaration (an organ and/or tissue donation, where required) has been reviewed.                                                                                   |                                                                                         |
| <input type="checkbox"/> | The possible outcomes, including not dying in a manner which allows organ donation are reviewed.                                                                                       | Patients and families are reminded the gift of life is given in the decision to donate. |
| <input type="checkbox"/> | The administration of heparin for DCD, where applicable, has been reviewed, including consent, and a dose has been ordered in consultation with the organ donation organization (ODO). |                                                                                         |

### Registered Nurse:

|      |           |                        |
|------|-----------|------------------------|
| Name | Signature | Date<br>YYYY / MM / DD |
|------|-----------|------------------------|

### Physician

|      |           |                        |
|------|-----------|------------------------|
| Name | Signature | Date<br>YYYY / MM / DD |
|------|-----------|------------------------|



## WLSM documentation tool template

---

|                                  |                     |                  |                        |
|----------------------------------|---------------------|------------------|------------------------|
| DATE INITIATED<br>YYYY / MM / DD | TIME INITIATED<br>: | FOLIO ___ of ___ | PATIENT IDENTIFICATION |
|----------------------------------|---------------------|------------------|------------------------|

### Withdrawal of life-sustaining measures symptom based critical care

#### Instructions for Use

1. This is a template for a nursing documentation tool to chart events, vitals, and medication administration from the time of withdrawal of life-sustaining measures (life support) and death, transfer to a unit outside the ICU or when 12 hours has lapsed. This template may be used, or it may inform the development of a similar organizational tool for your local unit. Units may want to consider the use of additional RT and or MD documentation tools.
2. Once this document is invoked, a notation in the usual ICU charting document (flowsheet or electronic charting) should be made to indicate that WLSM flowsheet charting has been initiated – e.g. “See WLSM flowchart”.
3. If a patient remains alive for an extended period of time following WLSM, usual charting is resumed and a notation should be made in both this flowchart and the usual chart to indicate the transition – e.g. “WLSM flowsheet ended”.
4. The minimum charting requirements are as follows:
  - a. vital signs are charted just prior to withdrawal and then hourly for the next 12 hours;
  - b. rationale for any bolus medication or change in infusion rate is included;
  - c. action plans (as detailed in the orders) should be copied on to page 2 of this document prior to withdrawal; and
  - d. time of death, declaring providers, and method of declaration must be charted on page 3.
5. If a symptom (listed A-K) is used to justify a bolus or infusion rate change, the letter corresponding to the symptom should be circled.
6. If additional narrative charting is necessary and does not fit on the flow chart, a number can be written and circled to indicate the reader should review the continuation of the note on page 3 of this document.
7. Symptom documentation supports ease of use and compliance. However, the use of validated scales such as BPS, CPOT and RDOS would provide additional value and more objective data. Programs should consider the use of validated scales.
8. Samples of pain, sedation and respiratory scales have been attached as an appendix on page 4.



|                                                                 |                    |
|-----------------------------------------------------------------|--------------------|
| DATE OF DEATH<br>YYYY / MM / DD                                 | TIME OF DEATH<br>: |
| DEATH WAS PRONOUNCED BY:<br>PHYSICIAN 1 _____ PHYSICIAN 2 _____ |                    |
| OTHER NOTES                                                     |                    |

|                        |
|------------------------|
| PATIENT IDENTIFICATION |
|------------------------|

\*\*\* The below table refers to numbered charting notes from page 2 of this document. \*\*\*

| #  | Note | #  | Note |
|----|------|----|------|
| 1  |      | 13 |      |
| 2  |      | 14 |      |
| 3  |      | 15 |      |
| 4  |      | 16 |      |
| 5  |      | 17 |      |
| 6  |      | 18 |      |
| 7  |      | 19 |      |
| 8  |      | 20 |      |
| 9  |      | 21 |      |
| 10 |      | 22 |      |
| 11 |      | 23 |      |
| 12 |      | 24 |      |

**Post-WLSM huddle**

|                       |                                                                                                                                                                                                                |
|-----------------------|----------------------------------------------------------------------------------------------------------------------------------------------------------------------------------------------------------------|
| <b>Date initiated</b> | YYYY / MM / DD                                                                                                                                                                                                 |
| <b>Time</b>           | :                                                                                                                                                                                                              |
| <b>Attending</b>      | <input type="checkbox"/> MD<br><input type="checkbox"/> RN<br><input type="checkbox"/> RT<br><input type="checkbox"/> Social work<br><input type="checkbox"/> Spiritual care<br><input type="checkbox"/> Other |

**Charting healthcare practitioners**

| Initials | Name | Designation |
|----------|------|-------------|
|          |      |             |
|          |      |             |
|          |      |             |
|          |      |             |
|          |      |             |

## Examples of pain and sedation scales

### Richmond Agitation-Sedation Scale (RASS)

| Scale | Label             | Description                                                                           |
|-------|-------------------|---------------------------------------------------------------------------------------|
| +4    | COMBATIVE         | Combative, violent, immediate danger to staff                                         |
| +3    | VERY AGITATED     | Pulls to remove tubes or catheters; aggressive                                        |
| +2    | AGITATED          | Frequent non-purposeful movement, fights ventilator                                   |
| +1    | RESTLESS          | Anxious, apprehensive, movements not aggressive                                       |
| 0     | ALERT & CALM      | Spontaneously pays attention to caregiver                                             |
| -1    | DROWSY            | Not fully alert, but has sustained awakening to voice (eye opening & contact >10 sec) |
| -2    | LIGHT SEDATION    | Briefly awakens to voice (eyes open & contact <10sec)                                 |
| -3    | MODERATE SEDATION | Movement or eye opening to voice (no eye contact)                                     |

↳ If RASS is ≥ -3 proceed to CAM-ICU (is patient CAM-ICU positive or negative?)

|    |               |                                                                           |
|----|---------------|---------------------------------------------------------------------------|
| -4 | DEEP SEDATION | No response to voice, but movement or eye opening to physical stimulation |
| -5 | UNAROUSABLE   | No response to voice or physical stimulation                              |

↳ If RASS is -4 or -5 → STOP (patient unconscious), RECHECK later

Sessler, et al. Am J Respir Crit Care Med 2002. 166: 1338-1344 Ely et al. JAMA 2003.286. 2983-2991

V  
O  
I  
C  
E

T  
O  
U  
C  
H

### Riker Sedation-Agitation Scale (SAS)

| Score | Term                 | Descriptor                                                                                                        |
|-------|----------------------|-------------------------------------------------------------------------------------------------------------------|
| 7     | Dangerous Agitation  | Pulling at ET tube, trying to remove catheters, climbing over bedrail, striking at staff, thrashing side-to-side  |
| 6     | Very Agitated        | Requiring restraint and frequent verbal reminding of limbs, biting ETT                                            |
| 5     | Agitated             | Anxious or physically agitated, calms to verbal instructions                                                      |
| 4     | Calm and Cooperative | Calm, easily arousable, follow commands                                                                           |
| 3     | Sedated              | Difficult to arouse but awakens to verbal stimuli or gentle shaking, follows simple commands but drifts off again |
| 2     | Very Sedated         | Arouses to physical stimuli but does not communicate or follow commands, may move spontaneously                   |
| 1     | Unarousable          | Minimal or no response to noxious stimuli, does not communicate or follow commands                                |

### Behavioral Pain Scale (BPS)

| Item                                   | Description                                              | Score |
|----------------------------------------|----------------------------------------------------------|-------|
| Facial expression                      | Relaxed                                                  | 1     |
|                                        | Partially tightened (e.g. brow lowering)                 | 2     |
|                                        | Fully tightened (e.g. eyelid closing)                    | 3     |
|                                        | Grimacing                                                | 4     |
| Upper limb movement                    | No movement                                              | 1     |
|                                        | Partially bent                                           | 2     |
|                                        | Fully bent with finger flexion                           | 3     |
|                                        | Permanently retracted                                    | 4     |
| Compliance with mechanical ventilation | Tolerating movement                                      | 1     |
|                                        | Coughing but tolerating ventilation for the most of time | 2     |
|                                        | Fighting ventilator                                      | 3     |
|                                        | Unable to control ventilation                            | 4     |

### Respiratory Distress Observation Scale (RDOS)

| Variable                                                  | 0 pts | 1 pt               | 2 pts                                                           |
|-----------------------------------------------------------|-------|--------------------|-----------------------------------------------------------------|
| Heart rate per minute                                     | < 90  | 90 – 109           | > 109                                                           |
| Respiratory rate per minute                               | < 19  | 19 – 30            | > 30                                                            |
| Restlessness: non-purposeful movements                    | None  | Occasional, slight | Frequent                                                        |
| Accessory muscle use: rise in clavicle during inspiration | None  | Slight             | Pronounced                                                      |
| Paradoxical breathing                                     | None  | -                  | Present                                                         |
| Grunting at end-expiration: guttural sound                | None  | -                  | Present                                                         |
| Nasal flaring: involuntary movement of nares              | None  | -                  | Present                                                         |
| Look of fear                                              | None  | -                  | Eyes wide open, facial muscles tense, brow furrowed, mouth open |

\*Note: BPS score ranges from 3 (no pain) to 12 (maximum pain).

Journal of Palliative Medicine. 2010; 13(3): 285-290

### Critical-Care Pain Observational Tool (CPOT)

| Indicator                                           | Score                                  | Description                                                                                                                                                               |
|-----------------------------------------------------|----------------------------------------|---------------------------------------------------------------------------------------------------------------------------------------------------------------------------|
| Facial expressions                                  | Relaxed, neutral                       | 0 No muscle tension observed                                                                                                                                              |
|                                                     | Tense                                  | 1 Presence of frowning, brow lowering, orbit tightening and levator contraction or any other change (e.g. opening eyes or tearing during nociceptive procedures)          |
|                                                     | Grimacing                              | 2 All previous facial movements plus eyelid tightly closed (the patient may present with mouth open or biting the endotracheal tube)                                      |
| Body movements                                      | Absence of movement or normal position | 0 Does not move at all (doesn't necessarily mean absence of pain) or normal position (movements not aimed toward the pain site or not made for the purpose of protection) |
|                                                     | Protection                             | 1 Slow, cautious movements, touching or rubbing the pain site, seeking attention through movements                                                                        |
|                                                     | Restlessness/Agitation                 | 2 Pulling tube, attempting to sit up, moving limbs/thrashing, not following commands, striking at staff, trying to climb out of bed                                       |
| Compliance with the ventilator (intubated patients) | Tolerating ventilator or movement      | 0 Alarms not activated, easy ventilation                                                                                                                                  |
|                                                     | Coughing but tolerating                | 1 Coughing, alarms may be activated but stop spontaneously                                                                                                                |
|                                                     | Fighting ventilator                    | 2 Asynchrony: blocking ventilation, alarms frequently activated                                                                                                           |
| OR<br>Vocalization (extubated patients)             | Talking in normal tone or no sound     | 0 Talking in normal tone or no sound                                                                                                                                      |
|                                                     | Sighing, moaning                       | 1 Sighing, moaning                                                                                                                                                        |
|                                                     | Crying out, sobbing                    | 2 Crying out, sobbing                                                                                                                                                     |
| Muscle tension                                      | Relaxed                                | 0 No resistance to passive movements                                                                                                                                      |
|                                                     | Tense, rigid                           | 1 Resistance to passive movements                                                                                                                                         |
|                                                     | Very tense or rigid                    | 2 Strong to passive movements or incapacity to complete them                                                                                                              |
| <b>Total</b>                                        |                                        | <b>/ 8</b>                                                                                                                                                                |

\*Note: When a patient's CPOT is >3, the team will evaluate pain sources and modify/enhance pain management. CPOT sensitivity = 86% and specificity = 78% (Gélinas C, J Pain Sympt Man 2009). Adapted from Gélinas et al., AJCC 2006; 15(4):420-427). Reproduced with permission. For more information about the CPOT use, contact the author at celine.gelinas@mcgill.ca

## WLSM family information

---

### What does it mean to withdraw life-sustaining measures or life support?

Your care team is there to help you and your loved one. However, when a patient is very ill, the care team cannot always help them get better despite their best treatments, efforts and hopes. In these situations, the aim is to keep your loved one comfortable while allowing them to die with dignity and respect.

Withdrawal of life-sustaining measures involves several steps, throughout which respect, dignity and your loved one's comfort is the care team's main priority. When the decision is made to withdraw life support and allow death to occur, you can expect the following to take place:

- Medications that control blood pressure or heart rate will be stopped
- The ventilator (breathing machine) will be turned off and the breathing tube is usually removed
- If your loved one is on dialysis, it will be discontinued
- The vital signs monitor may be turned off; staff will watch your loved one for comfort rather than checking his or her vital signs
- Routine tests like blood work and X-rays will no longer be ordered
- Intravenous fluids will be decreased or stopped
- Tube feeding will be stopped and the feeding tube may be removed
- Any treatments or medications that are not aimed at treating symptoms, increasing comfort, maintaining dignity or supporting cultural-social well-being will also be stopped

Adjustments may occur to meet the needs of your family and your loved one. Your care team will discuss these steps with you in more detail.

### What can I expect after life support is withdrawn?

It is difficult to predict when death will occur. In some cases, it comes quickly. In other circumstances, it may occur several hours or even days after life support is withdrawn. Regardless of the amount of time before death, your loved one will continue to receive care.

### What symptoms could my loved one experience and how will these be treated?

Your loved one will be closely watched for signs of pain or distress. If you notice any change that concerns you, tell a member of your care team.

#### ***Pain and shortness of breath:***

- Pain may cause changes in facial expression, agitation, or other signs of discomfort. Pain will be treated with medications like morphine which can be quickly adjusted to ensure comfort.
- Shortness of breath may occur, particularly as the breathing machine is turned off and the breathing tube removed. Medications are given to ensure that your loved one is comfortable.

- When pain and shortness of breath are treated with medication, the dose given will be based on the amount of comfort medication your loved one is already receiving. Studies have shown that giving medication for comfort does not shorten life. There is no reason to over treat or undertreat pain or shortness of breath.

#### ***Changes in breathing pattern:***

- You may notice pauses in breathing, snoring, or rapid shallow breathing. This is a normal part of the dying process and not necessarily a sign of discomfort. It generally does not need to be treated.
- Changes in swallowing may cause saliva to pool at the back of the mouth and cause a rattling or gurgling noise when your loved one breathes. This is likely not uncomfortable for your loved one. However, medications and treatments may be given if it causes discomfort.

#### ***Anxiety and agitation:***

- Signs of agitation can include restlessness, frequent movements, or pulling at blankets and tubes. Your loved one will be watched closely for these symptoms and provided sedative medications as needed.

#### ***Hunger and thirst:***

- At end-of-life, most people do not feel hungry or thirsty. As the body's systems begin to shut down it can become difficult for people to tolerate food and fluids. For this reason, stopping fluids and tube feeding during this time is recommended. Some people experience discomfort from dry lips or a dry tongue. This is best treated with moist swabs or an artificial saliva spray rather than giving fluids intravenously.

### **How can I support my loved one during this time?**

You are welcome to be in the room as life support is stopped. This is a very personal decision. Some families and family members prefer to be present and others do not. Your health care team will support any decision you make. Simply sitting with your loved one, speaking quietly with them, and holding their hand can help to provide comfort.

If you would like to bring in items like photos, music, and letters from friends and family to celebrate the life of your loved one, you may do so. If there are cultural or religious rituals that are important to your loved one, you may bring in your own spiritual leader or ask your care team to help arrange this.

### **What if I need support?**

During this time, you may have many different feelings such as sadness, anger, fear, guilt, or even relief. It can be helpful to talk with the friends and family members about your feelings and fears. All members of your health care team, including the doctors, nurses, respiratory therapists, social workers and spiritual care providers are there to support you during this very difficult time. If you would like some time alone, there are spaces in the hospital for quiet reflection or prayer.

Community resources are available to support your family during and after the end-of-life process. Your care team can provide more information on what support is available.

### **If I have questions, who can I ask?**

If you are concerned about your loved one's comfort at any time or have questions about their symptoms and how they are being treated, please let a member of your care team know. Sometimes it helps to write down questions or concerns.

There are many members of the team caring for your loved one. With around-the-clock care, you may meet doctors, nurses, and respiratory therapists who will become new members of your care team. Feel free to ask questions and introduce yourself. Your care team is there to support you and your family throughout end-of-life care.

### **What if our loved one wanted to be an organ or tissue donor?**

Organ and tissue donation may be an option following death. Experts in organ and tissue donation are available to answer questions and support you and your family through the donation process. Your care team may raise the issue of donation with your family. Please feel free to talk to your team about organ and tissue donation.

If your loved one wishes to donate his or her organs and or tissues, the timing for withdrawal of life support will be discussed. The organ and tissue donation teams and the physicians from the intensive care unit will be a part of the discussion with you and your family. All teams and team members will ensure your loved one is comfortable. The medications they receive for comfort will not change.

Additional medications and tests may be required. If so, the organ donation coordinator will discuss this with you.

You will be able to be with your loved one when life support is removed. Vital sign monitors will remain in place. When your loved one dies, two physicians will confirm that death has occurred. Your loved one will then be moved to the operating room for donation. If you wish to be with your loved one after organ donation has taken place that can be arranged.

Even if your loved one wished to be an organ donor, donation may not always be possible. The dying process is unpredictable and may take longer than expected. In some cases, your loved one's organs may not have received enough oxygen to work well for someone else. It is important to remember the gift of life is in the decision to donate. We recognize the potential disappointment when organ donation is not possible and will do all we can to support you through this.

The timeline for tissue donation is different from organ donation and may occur within 24 hours of death.

Staff from the intensive care unit and the organ and tissue donation teams will be available to answer any questions you may have. If you wish to discuss organ donation or your decision to do so, please ask to speak to a member of your care team at any time.

## Questions?

You may still have questions about what happens at end-of-life. Sometimes it helps to write down your questions. Please don't hesitate to ask questions and raise any concerns you may have with any member of your care team. Your care team is there to support you, your loved one and your family through this difficult time.



# eAppendix 6

## WLSM system audit

| DATE<br>YYYY / MM / DD | HOSPITAL NAME | UNIT |
|------------------------|---------------|------|
|------------------------|---------------|------|

The purpose of this audit is to enhance the quality of the process of withdrawal of life-sustaining measures (WLSM) in special care units where life support measures are used. Intensive care units (general or specialized), cardiac care units, high acuity units, step-down units, etc. Please note that this applies to the **clinical** process of WLSM, and NOT the decision-making process.

As a unit, your task is to document whether you have the following best practices in place in advance of WLSM from a patient. A comment section is available for your use. **Please comment on any "No" answers.** These are based on the Canadian Critical Care Society's Guidelines on Withdrawal of Life-Sustaining Measures.

*To be completed by Physician and Administration lead for the unit, in consultation with front line staff.*

### Policy and procedure background work

| Policy and Procedure                                                                                                                                                                                                                                                                        | Yes | No | Comments |
|---------------------------------------------------------------------------------------------------------------------------------------------------------------------------------------------------------------------------------------------------------------------------------------------|-----|----|----------|
| Does the organization have a specific policy on WLSM?                                                                                                                                                                                                                                       |     |    |          |
| Does the policy reference the CCCS Guidelines on WLSM?                                                                                                                                                                                                                                      |     |    |          |
| Does the organization have an organ and tissue donation committee?                                                                                                                                                                                                                          |     |    |          |
| Has the donation committee reviewed the CCCS guidelines for WLSM and local policy, if present?                                                                                                                                                                                              |     |    |          |
| Does the organization routinely evaluate or audit cases of WLSM?<br>If yes, is there a case audit tool?                                                                                                                                                                                     |     |    |          |
| Is there a process in place to assess and communicate audit results at defined intervals? <ul style="list-style-type: none"> <li>someone responsible to conduct audits</li> <li>person responsible to analyze and provide feedback</li> <li>person responsible to act on results</li> </ul> |     |    |          |
| Is there a process to develop an inter-professional care plan for WLSM for each patient?<br>(e.g. mandatory huddle to discuss roles and responsibilities)                                                                                                                                   |     |    |          |
| Are there regular education sessions on staff roles in WLSM for: <ul style="list-style-type: none"> <li>physicians</li> <li>nurses</li> <li>RTs</li> </ul>                                                                                                                                  |     |    |          |
| <i>Please check yes/no for each and comment on frequency.</i>                                                                                                                                                                                                                               |     |    |          |
| <b>Notes:</b> (any missing item should be addressed in the action plan below)                                                                                                                                                                                                               |     |    |          |

## Preparing for WLSM

| Preparing for WLSM                                                                                                                                                                        | Yes | No | Comments |
|-------------------------------------------------------------------------------------------------------------------------------------------------------------------------------------------|-----|----|----------|
| Can the unit provide a private room for patients at end-of-life?<br><i>If yes, please comment on frequency (e.g. always, usually, sometimes).</i>                                         |     |    |          |
| Is there a separate family room for family to gather, particularly if their loved one is at end-of-life?<br><i>If yes, please comment on frequency (e.g. always, usually, sometimes).</i> |     |    |          |
| Are there environmental aids (e.g. signs) identifying, in an unobtrusive way, the process of WLSM has started (facilitates liberal visiting, etc.)?                                       |     |    |          |
| Is acute grief support available for families?<br><i>If so, please specify who provides this.</i>                                                                                         |     |    |          |
| Are families welcome to be present for WLSM and participate in the patient care before, during and after?                                                                                 |     |    |          |
| For challenging or complicated cases, practitioners are encouraged to seek advice and support from colleagues.                                                                            |     |    |          |
| <b>Notes:</b> <i>(any missing item should be addressed in the action plan below)</i>                                                                                                      |     |    |          |

## Assessment of distress during WLSM

| Assessment of distress during WLSM                                                                                | Yes | No | Comments |
|-------------------------------------------------------------------------------------------------------------------|-----|----|----------|
| Is there a specific documentation tool for documenting symptoms and treatment of symptoms in WLSM?                |     |    |          |
| Are standardized scoring systems or some objective measure of assessment embedded in this documentation for:      |     |    |          |
| • pain                                                                                                            |     |    |          |
| • respiratory distress                                                                                            |     |    |          |
| • agitation                                                                                                       |     |    |          |
| • delirium                                                                                                        |     |    |          |
| <i>Please check yes/no for each.</i>                                                                              |     |    |          |
| Is there education for staff to ensure families can also contribute to the assessment of symptoms at end-of-life? |     |    |          |
| <b>Notes:</b> <i>(any missing item should be addressed in the action plan below)</i>                              |     |    |          |

### Discontinuation of treatment and monitoring

| Does the unit have the following materials available?                         | Yes | No | Comments |
|-------------------------------------------------------------------------------|-----|----|----------|
| Guideline and/or clinical protocol for WLSM process (step-by-step procedure)  |     |    |          |
| Checklist to support the WLSM process in real time with each patient          |     |    |          |
| Pre-printed standardized orders for WLSM                                      |     |    |          |
| Educational material for staff for WLSM process                               |     |    |          |
| Educational material for family for WLSM process                              |     |    |          |
| Documentation tools for WLSM process                                          |     |    |          |
| <b>Notes:</b> (any missing item should be addressed in the action plan below) |     |    |          |

### Following WLSM and patient death

| Are the following in place?                                                                                                                                                                                   | Yes | No | Comments |
|---------------------------------------------------------------------------------------------------------------------------------------------------------------------------------------------------------------|-----|----|----------|
| Bereavement material available for family                                                                                                                                                                     |     |    |          |
| Family satisfaction with WLSM survey.<br>If yes, <ul style="list-style-type: none"> <li>• how frequently is it done?</li> <li>• who sends out surveys?</li> <li>• who analyzes results of surveys?</li> </ul> |     |    |          |
| Process for staff debriefing after WLSM<br>If yes, <ul style="list-style-type: none"> <li>• is it formalized?</li> <li>• who decides on need for debrief?</li> <li>• who conducts debrief?</li> </ul>         |     |    |          |
| <b>Notes:</b> (any missing item should be addressed in the action plan below)                                                                                                                                 |     |    |          |

**System audit follow up action items and accountability**

| ACTION ITEM | ACCOUNTABILITY |
|-------------|----------------|
|             |                |
|             |                |
|             |                |
|             |                |
|             |                |

|              |                        |           |
|--------------|------------------------|-----------|
| PERFORMED BY | DATE<br>YYYY / MM / DD | TIME<br>: |
|--------------|------------------------|-----------|

-----

System audit tool helped facilitate discussion:     Yes     No

Tool requires revision:     No     Yes – Feedback provided to \_\_\_\_\_

A repeat system audit will be completed for this unit in \_\_\_\_\_ months (suggest: 12)

# eAppendix 7

## WLSM case audit

|                                     |              |                                                                   |
|-------------------------------------|--------------|-------------------------------------------------------------------|
| DATE WLSM STARTED<br>YYYY / MM / DD | IDENTIFIER 1 | IDENTIFIER 2                                                      |
| NAME                                | MRN          | <input type="checkbox"/> DCD <input type="checkbox"/> No donation |

Cause of Death/Decision for WLSM: \_\_\_\_\_

### Event timing

| Event                                                                         | Time                                                                                                                                                                                       | Comments                       |                                 |                                |  |  |
|-------------------------------------------------------------------------------|--------------------------------------------------------------------------------------------------------------------------------------------------------------------------------------------|--------------------------------|---------------------------------|--------------------------------|--|--|
| Withdrawal of vasopressors                                                    | Start<br>:<br>Complete<br>:                                                                                                                                                                |                                |                                 |                                |  |  |
| Withdrawal of mechanical ventilation                                          | Start<br>:<br>Complete<br>:                                                                                                                                                                |                                |                                 |                                |  |  |
| Withdrawal of supplemental oxygen                                             | Start<br>:<br>Complete<br>:                                                                                                                                                                |                                |                                 |                                |  |  |
| Extubation                                                                    | :                                                                                                                                                                                          |                                |                                 |                                |  |  |
| Death                                                                         | Date / Time<br>YYYY/MM/DD<br>:                                                                                                                                                             |                                |                                 |                                |  |  |
| Transfer from unit prior to death.<br><i>If yes, document date and time.</i>  | <table border="1"> <tr> <td><input type="checkbox"/><br/>No</td> <td><input type="checkbox"/><br/>Yes</td> </tr> <tr> <td colspan="2">Date / Time<br/>YYYY/MM/DD<br/>:</td> </tr> </table> | <input type="checkbox"/><br>No | <input type="checkbox"/><br>Yes | Date / Time<br>YYYY/MM/DD<br>: |  |  |
| <input type="checkbox"/><br>No                                                | <input type="checkbox"/><br>Yes                                                                                                                                                            |                                |                                 |                                |  |  |
| Date / Time<br>YYYY/MM/DD<br>:                                                |                                                                                                                                                                                            |                                |                                 |                                |  |  |
| Bedside monitors                                                              | <input type="checkbox"/> ON <input type="checkbox"/> OFF                                                                                                                                   |                                |                                 |                                |  |  |
| <b>Notes:</b> (any missing item should be addressed in the action plan below) |                                                                                                                                                                                            |                                |                                 |                                |  |  |

## Preparation for WLSM

Location of documentation sought in the audit predefined by site. Do not include items suggested below if not routinely documented at your site. Location can be in nursing or physician's notes or use of specific checklist completed for WLSM. A checklist is strongly recommended where items match the audit.

| Which of the following are clearly <u>documented</u> ?                                       | Yes | No | Comments |
|----------------------------------------------------------------------------------------------|-----|----|----------|
| Multidisciplinary care plan for WLSM                                                         |     |    |          |
| Notification of Organ Donation Organization                                                  |     |    |          |
| Patient/family offered the opportunity for organ and tissue donation                         |     |    |          |
| Pre-WLSM huddle of physician, RN, RT, social work, others                                    |     |    |          |
| Explicit decision made regarding use of bedside monitors and in consultation with family     |     |    |          |
| Signal/sign posted that WLSM is occurring                                                    |     |    |          |
| Spiritual/culture needs of patient and family discussed prior to WLSM                        |     |    |          |
| Spiritual/culture support offered to patient and family                                      |     |    |          |
| Family encouraged and permitted to participate in patient care before, during and after WLSM |     |    |          |
| <b>Notes:</b> (any missing item should be addressed in the action plan below)                |     |    |          |

## Process of WLSM

| Steps                                                                         | Yes | No | Comments |
|-------------------------------------------------------------------------------|-----|----|----------|
| Family present during WLSM                                                    |     |    |          |
| Concern noted regarding RN availability during WLSM                           |     |    |          |
| Concern noted regarding RT availability during WLSM                           |     |    |          |
| Concern noted regarding MD availability during WLSM                           |     |    |          |
| Standardized order set available and signed in advance of WLSM                |     |    |          |
| <i>Check documented times.</i>                                                |     |    |          |
| <b>Notes:</b> (any missing item should be addressed in the action plan below) |     |    |          |

## Assessment of distress and symptom relief during WLSM

*It is assumed each unit will use only one scoring system for symptoms.*

| Is the following documented in the RN notes?                                                                                                                                                             | Consistently        | Inconsistently        | Not at All        | Comments        |
|----------------------------------------------------------------------------------------------------------------------------------------------------------------------------------------------------------|---------------------|-----------------------|-------------------|-----------------|
| Pain score used                                                                                                                                                                                          |                     |                       |                   |                 |
| Sedation score used                                                                                                                                                                                      |                     |                       |                   |                 |
| Respiratory distress score used                                                                                                                                                                          |                     |                       |                   |                 |
| Delirium score used                                                                                                                                                                                      |                     |                       |                   |                 |
| Medication name(s) and dose(s) used to treat anticipated symptoms with documented rationale                                                                                                              |                     |                       |                   |                 |
| For evident symptoms, administration of medication included documentation of: <ul style="list-style-type: none"> <li>• score prompting use of medications</li> <li>• dose</li> <li>• response</li> </ul> | <b>Consistently</b> | <b>Inconsistently</b> | <b>Not at All</b> | <b>Comments</b> |
|                                                                                                                                                                                                          |                     |                       |                   |                 |
|                                                                                                                                                                                                          |                     |                       |                   |                 |
|                                                                                                                                                                                                          |                     |                       |                   |                 |
| <b>Notes:</b> <i>(any missing item should be addressed in the action plan below)</i>                                                                                                                     |                     |                       |                   |                 |

## Following death

*The following items are suggestions. Documentation must be clear and a post WLSM checklist matching the items below is suggested.*

| Follow up                                                                            | Yes | No | Comments |
|--------------------------------------------------------------------------------------|-----|----|----------|
| Grief literature/information/support offered to family                               |     |    |          |
| Referral to community bereavement support                                            |     |    |          |
| Suggestion whether to review case documented                                         |     |    |          |
| <b>Notes:</b> <i>(any missing item should be addressed in the action plan below)</i> |     |    |          |

**Case audit follow up action items and accountability**

| ACTION ITEM | ACCOUNTABILITY |
|-------------|----------------|
|             |                |
|             |                |
|             |                |
|             |                |
|             |                |

|              |                        |           |
|--------------|------------------------|-----------|
| PERFORMED BY | DATE<br>YYYY / MM / DD | TIME<br>: |
|--------------|------------------------|-----------|

-----

Case audit tool helped facilitate discussion:     Yes     No

Tool requires revision:     No     Yes – Feedback provided to \_\_\_\_\_



## WLSM policy

---

### Withdrawal of life-sustaining measures (WLSM)

The inter-professional team's primary responsibility is to ensure that decisions are being made in the best interests of the patient which should be guided by the following principles:

- to honor the patient's wishes at end-of-life;
- to offer care that is collaborative with a shared-decision making model;
- to support family/substitute decision maker (SDM) during the difficult decision-making process;
- to align evidence-based interventions with the patient and family's values, beliefs and goals;
- to alleviate suffering and prevent harm; and
- to communicate clearly and respectfully with the patient, family and inter-professional team.

Prior to WLSM, an inter-professional care plan should be created for each patient focusing on symptom management, order and pace of withdrawal, and family support. Referral to an organ and tissue donation program, if appropriate, should also be initiated.

WLSM should be carried out in accordance with the 2016 Canadian Critical Care Society's Guidelines, and applied in accordance with the following principles, while respecting the needs and wishes of patients and their families.

The principles of expert inter-professional critical care must foster a seamless transition into end-of-life care. It is imperative that end-of-life care in the critically ill be of the highest quality, in all circumstances, including that of organ and tissue donation.

High quality end-of-life care:

- maintains dignity, respect and compassion;
- explores the wishes and voices of the patient and family/SDM;
- respects cultural, spiritual values and observances;
- continues to support and partner with patients, families/SDM and health care team members throughout the death experience;
- is consistent with guidelines for WLSM;
- focuses on alleviating pain, distress and providing comfort;
- adheres to the existing medicolegal framework that includes respect for the dead donor rule and precludes intentional hastening of death (notwithstanding medical assistance in dying legislation);
- avoids unnecessary prolongation of the dying process; and
- preserves the opportunity to donate organs and tissues.

These principles of person-centered care in the intensive care unit must be maintained throughout conversations, assessments, and procedures involved in organ and tissue donation. While it is acknowledged that individual WLSM plans may be subject to variability in response to patient/family/SDM priorities, these principles of high quality care must be maintained.

## Symptom management

- 1.1 Objective signs of pain, shortness of breath, agitation, and delirium should be used to guide symptomatic treatment. Neuromuscular blocking agents should be discontinued before withdrawal of life support to aid in symptom assessment.
- 1.2 Medications should be used both to treat current symptoms and in anticipation of symptoms that are likely to arise. The rationale for giving any comfort medication should be documented.
- 1.3 A specific titration schedule for opioid and sedative medications should be utilized and medications should be titrated to symptoms with no dose limit.
- 1.4 Pain and dyspnea should be treated with opioids before employing the use of sedatives for anxiety or agitation.
- 1.5 Medications to alleviate other symptoms such as excessive secretions, post-extubation stridor, and nausea should also be included in the care plan.

## Discontinuation of treatment

- 2.1 Liberalized family visiting should be offered and where possible, a space for the family to gather privately should be arranged. The approach to monitoring should be reviewed with the family/SDM and the healthcare team. An unobtrusive signal should be displayed outside to alert members of the health care team that WLSM is occurring.
- 2.2 The pace and order of withdrawal should be individualized to the needs of the patient. However, consideration should be given to withdrawing vasopressors and inotropes first, followed by mechanical ventilation and the artificial airway.
- 2.3 All non-comfort focused medications and interventions should be discontinued including dialysis, transfusions, parenteral feeding, enteral tube feeding, intravenous fluids, blood work, and imaging studies.
- 2.4 Providing that the patient is comfortable, mechanical ventilation should be withdrawn as quickly as possible. In the absence of contraindications, the patient should be extubated to room air and non-invasive ventilation or supplemental oxygen should not be provided except for comfort.
- 2.5 Implantable cardiac defibrillators should be deactivated prior to WLSM, and consideration should be given to discontinuing or disabling transvenous or permanent pacemakers.

## Family/substitute decision maker support

- 3.1 Family/SDM should be involved in shared-decision making.
- 3.2 Family/SDM should be invited to be present at the time of withdrawal and assist in patient care. This can include helping to provide comfort to the patient and assisting in symptom assessments.
- 3.3 Family/SDM should be offered spiritual and bereavement supports and efforts should be made to accommodate any religious or cultural rituals, including involvement of their own religious leaders.
- 3.4 Following the death of their loved one, family members should receive information on community bereavement resources along with a letter of condolence.

- 3.5 To facilitate excellent bereavement support, inter-professional team members should receive education on the grieving process and how to provide acute support.
- 3.6 Physicians should be available as needed for family/SDM and staff once life support has been withdrawn to answer questions and offer additional support.

### **Case audit and review**

- 4.1 Debriefing with the inter-professional team should be considered after each WLSM case.
- 4.2 Case audits should be performed after each case to ensure that protocols were followed and to identify opportunities for improvement.

### **Donation after circulatory determination of death (cDCDD)**

- 5.1 Patients should be referred to the provincial organ and tissue donation agency when there is a plan in place to WLSM.
- 5.2 The decision to proceed with WLSM should not be influenced by any member of the organ or tissue donation team. The patient and/or family/SDM should not be approached to discuss donation until after the decision to WLSM has been made by the patient or SDM and the treating team.
- 5.3 The principles of care during WLSM should be the same regardless of whether or not the patient is a candidate for organ donation, although the treatment plan may differ slightly in terms of symptom management and comfort medications. The orders for WLSM should be written by a member of the ICU team without input from the organ donation team.
- 5.4 Explicit consent should be obtained for the administration of any medications that are being prescribed to optimize the chances of organ donation, but are not normally part of WLSM, such as unfractionated heparin.
- 5.5 If the dying process is prolonged and the patient is no longer a candidate for organ donation, symptomatic management and family/SDM support will proceed as per the protocol outlined above. Tissue donation may still be appropriate and feasible in these situations.

*For further details regarding organ and tissue donation after death by circulatory criteria, please consult your institutional organ and tissue donation policy.*

## eAppendix 9. Research Opportunities

Throughout the workshop participants identified research opportunities in relation to WLSM and deceased donation. The key areas for future research identified included:

- Support
  - WLSM decision support for families and for health care professionals
  - how to involve families in WLSM
  - support practices in low resource settings
- Debriefing
  - pre and post WLSM, best practices; who, when and how
- Bereavement
  - best practices
  - how to best support families within the ICU and longer-term post death
  - preparing health care professionals and care providers in provision of immediate and future support
- Perspectives
  - the provision and impact of spiritual, religious and cultural care
- WLSM Practices & Education
  - Health care providers expressed concerns regarding the perception of hastening death within the context of WLSM and donation whereas family member participants concerns focused more around the prolongation of death. A future research topic for consideration may be to better understand whether health care provider's assumptions about family's concerns align with what families are experiencing.

Additional areas for research in relation to WLSM and donation were identified including:

1. Are decisions to WLSM influenced by the potential to donate organs and/or tissues?
2. How have recently developed guidelines for WLSM influenced/impacted practice in Canadian intensive care units?
3. How can bereavement support be implemented into low resource critical care settings?
4. Are decision support/decision aids useful in facilitating discussions regarding goals of care as well as organ and tissue donation?
5. What are best-practices related to spiritual/religious/cultural care within the context of organ and/or tissue donation?
6. What are the experiences of family members regarding: i) family presence during WLSM; ii) debriefing following WLSM; iii) bereavement support post WLSM and organ and/or tissue donation?
7. What are the experiences of family members who i) stay at the bedside throughout the process of WLSM; ii) choose not to be present at the bedside throughout the process of WLSM?
8. What are experiences of ICU clinicians and family members regarding the use of continued monitoring during the WLSM?
9. What are the experiences of families who consent to donation after cardio-circulatory death but the patient does not expire within recommended guideline timeframes?

10. Has the prevalence of “consented, not recovered” of “all potential donors” remained consistent over time?
11. What factors constitute “non-recovery” and have these factors stayed consistent over time?
12. Are there instances whereby hastening death related to donation after cardio-circulatory death is ever permissible?
13. What are current trends/practices with respect to consent for a treatment plan in comparison with consent for individual components of a treatment plan?

Communication and collaboration are of high importance in relation to WLSM and donation research; both to be aware of research the community is undertaking and working collaboratively to build on that research and to ensure its dissemination.
